# Supplementary material
Source: PubMed Central journal article supplement (PMC3503133)
Supplement: JVI.02171-12_zjv999096948so1.pdf [file JVI.02171-12_zjv999096948so1.pdf]

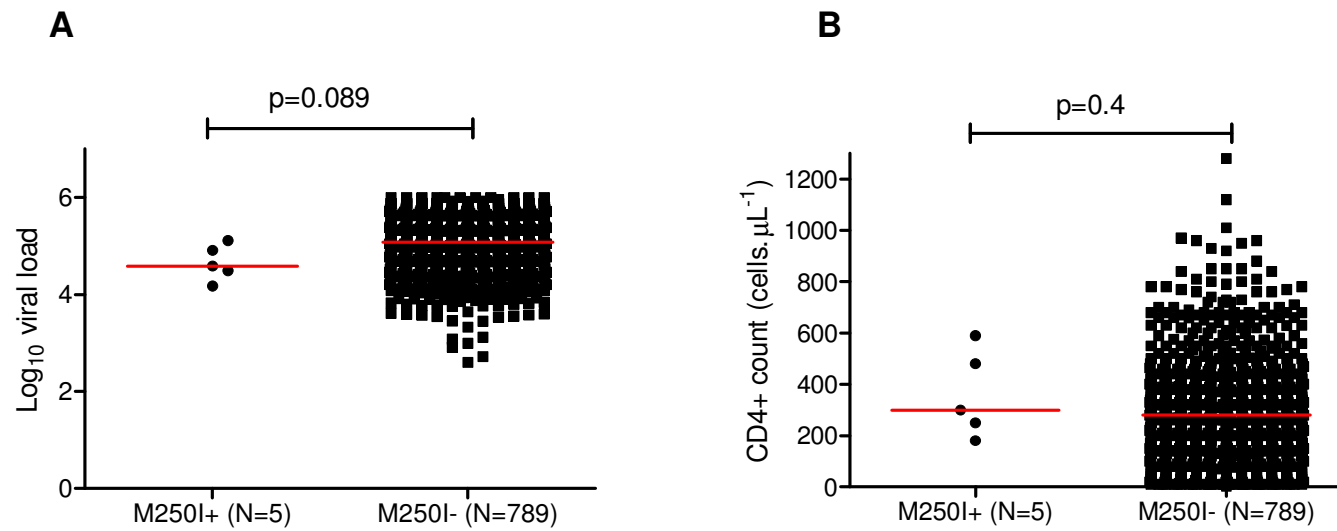

**Supplementary Figure 1: M250I mutation and disease progression in subtype B infections.** Comparison of plasma viral loads (panel A) and CD4+ counts (panel B) between individuals infected with M250I mutants and those without in the chronic subtype B cohort.

**Table S1:** List of Primers

| <b>Primer Name</b> | <b>Sequence</b>                                 | <b>HXB2 Numbering</b> |
|--------------------|-------------------------------------------------|-----------------------|
| Gag D Reverse      | AAT TCC TCC TAT CAT TTT TGG                     | 2382-2402             |
| Gag D Forward      | TCT CTA GCA GTG GCG CCC G                       | 626-644               |
| Gag A Forward      | CTC TCG ACG CAG GAC TCG GCT T                   | 683-704               |
| Gag C Reverse      | TCT TCT AAT ACT GTA TCA TCT GC                  | 2334-2356             |
| Gag A Reverse      | ACA TGG GTA TCA CTT CTG GGC T                   | 1282-1303             |
| Gag B Forward      | CCA TAT CAC CTA GAA CTT TGA AT                  | 1226-1246             |
| Gag B Reverse      | CTC CCT GAC ATG CTG TCA TCA T-                  | 1825-1846             |
| Gag C Forward      | CCT TGT TGG TCC AAA ATG CG                      | 1748-1768             |
| Gag BssHII F       | AGA AGG AGA GAG ATG GGC GCG CCA ACT CGA GGA     | 778-810               |
| Gag BssHII R       | TCC TCG AGT TGG CGC GCC CAT CTC TCT CCT TCT     | 778-810               |
| Gag XhoI F         | ATG ATA CAG TAC TCG AGG ACA TAA ATT TGC CA      | 2338-2369             |
| Gag XhoI R         | TGG CAA ATT TAT GTC CTC GAG TAC TGT ATC AT      | 2338-2369             |
| pBR-WT F           | GGCACTTACAACCAGCAACACAGCCTCCAATAATCCTGCTTGTGCC  | 8919-8964             |
| pBR-WT R           | GGCACAAGCAGGATTATTGGAGGCTGTGTTGCTGGTTGTAAGTGCC  | 8919-8964             |
| pBR-Rev F          | GACCAATGACTTATAAGGGAGCGTTTTGATCTCAGCTTCTTTTAA   | 9026-9070             |
| pBR-Rev R          | TTAAAAAGAAGCTGAGATCAAACGCTCCCTTATAAGTCATTGGTC   | 9026-9070             |
| T242N F            | GGAACTACTAGTAACCTTCAGGAACAA                     | 1501-1527             |
| T242N R            | TTGTTCTGAAGGTTACTAGTAGTTCC                      | 1501-1527             |
| M250I F            | ATAGCATGGATAACAAGTAAC                           | 1528-1548             |
| M250I R            | GTTACTTGTTATCCATGCTAT                           | 1528-1548             |
| IG-F               | GCATGGATAACAGGTAACCCACC                         | 1531-1553             |
| IG-R               | GGTGGGTACCTGTTATCCATGC                          | 1531-1553             |
| NIG-F              | CTACTAGTAACCTTCAGGAACAAATAGCATGGATAACAGGTAACCCA | 1505-1551             |
| NIG-R              | TGGGTACCTGTTATCCATGCTATTTGTTCTGAAGGTTACTAGTAG   | 1505-1551             |
| D260E-F            | TCCAGTGGGAGAAATCTATAAAAAG                       | 1557-1580             |
| D260E-R            | CTTTTATAGATTTCTCCCACTGGA                        | 1557-1580             |
| Nef-WT-For         | GCAACACAGCCGCAATAAT                             | 8933-8952             |
| Nef-Rev            | CGCTCCCTTATAAGTCATTGGTCTT                       | 1924-1948             |

**Table S2:** Stabilization effect of 248A on the subtype B M250I variant

| <b>Description of helix 6 peptide</b>       | <b>Sequence of helix 6 peptide*</b> | <b>Minimum energy value in predicted cluster</b> | <b>Maximum energy value in predicted cluster</b> |
|---------------------------------------------|-------------------------------------|--------------------------------------------------|--------------------------------------------------|
| 248G variant of HIV-1 subtype B (with 250I) | TLQEQI <u>G</u> WIT <u>N</u>        | -10.195 kCal/mol                                 | -10.116 kCal/mol                                 |
| 252S variant of HIV-1 subtype B (with 250I) | TLQEQI <u>G</u> WIT <u>S</u>        | -8.80 kCal/mol                                   | -4.70 kCal/mol                                   |
| 248A variant of HIV-1 subtype C (with 250I) | TLQEQI <u>A</u> WIT <u>N</u>        | -14.724 kCal/mol                                 | -14.717 kCal/mol                                 |

\*Peptide spans amino acids 242 to 252
